# Supplementary material
Source: PubMed Central journal article supplement (PMC3777728)
Supplement: NIHMS491546-supplement-2_si_001.pdf [file NIHMS491546-supplement-2_si_001.pdf]

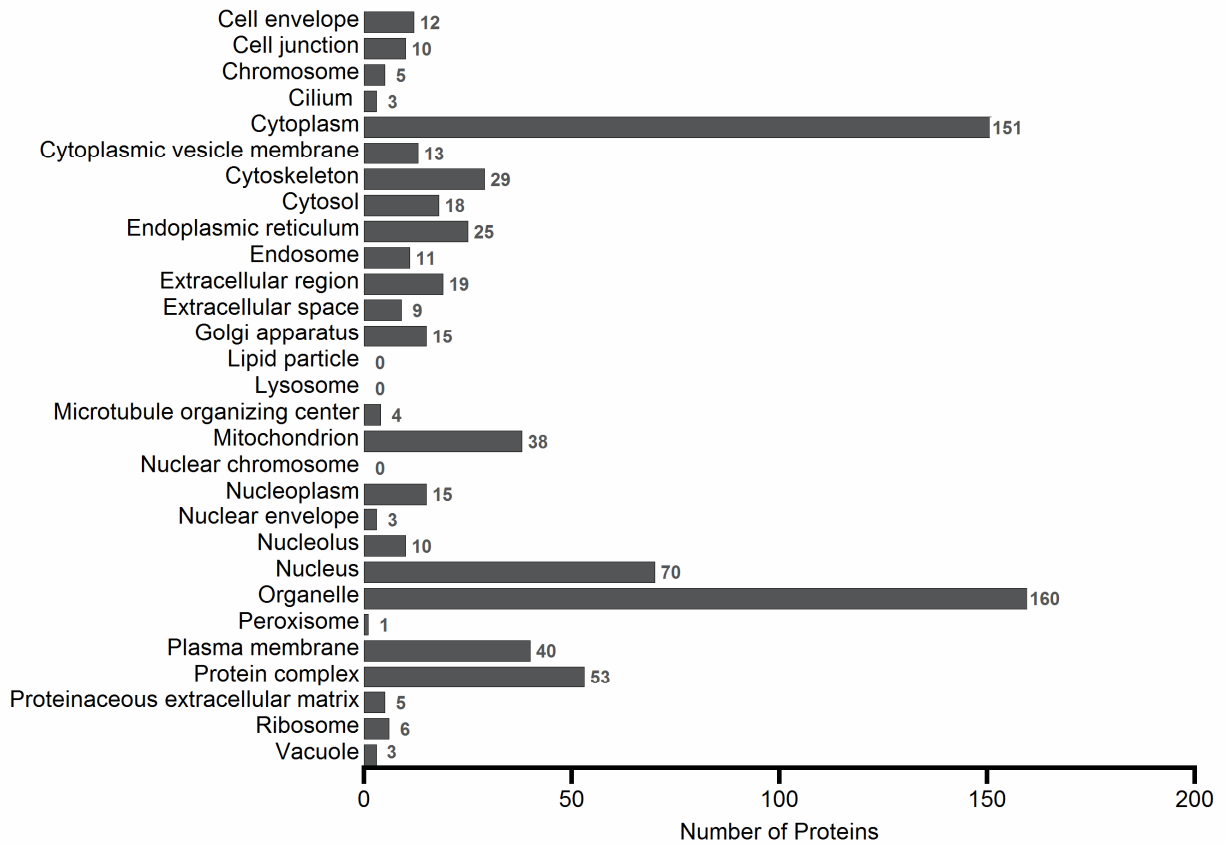

**Figure S1.** GO cellular component profile using protein IDs generated from the second injection of samples obtained using LysC/trypsin digestion and SCX separation. All categories are counted non-exclusively, when a protein has more than one category for cellular components or molecular function.

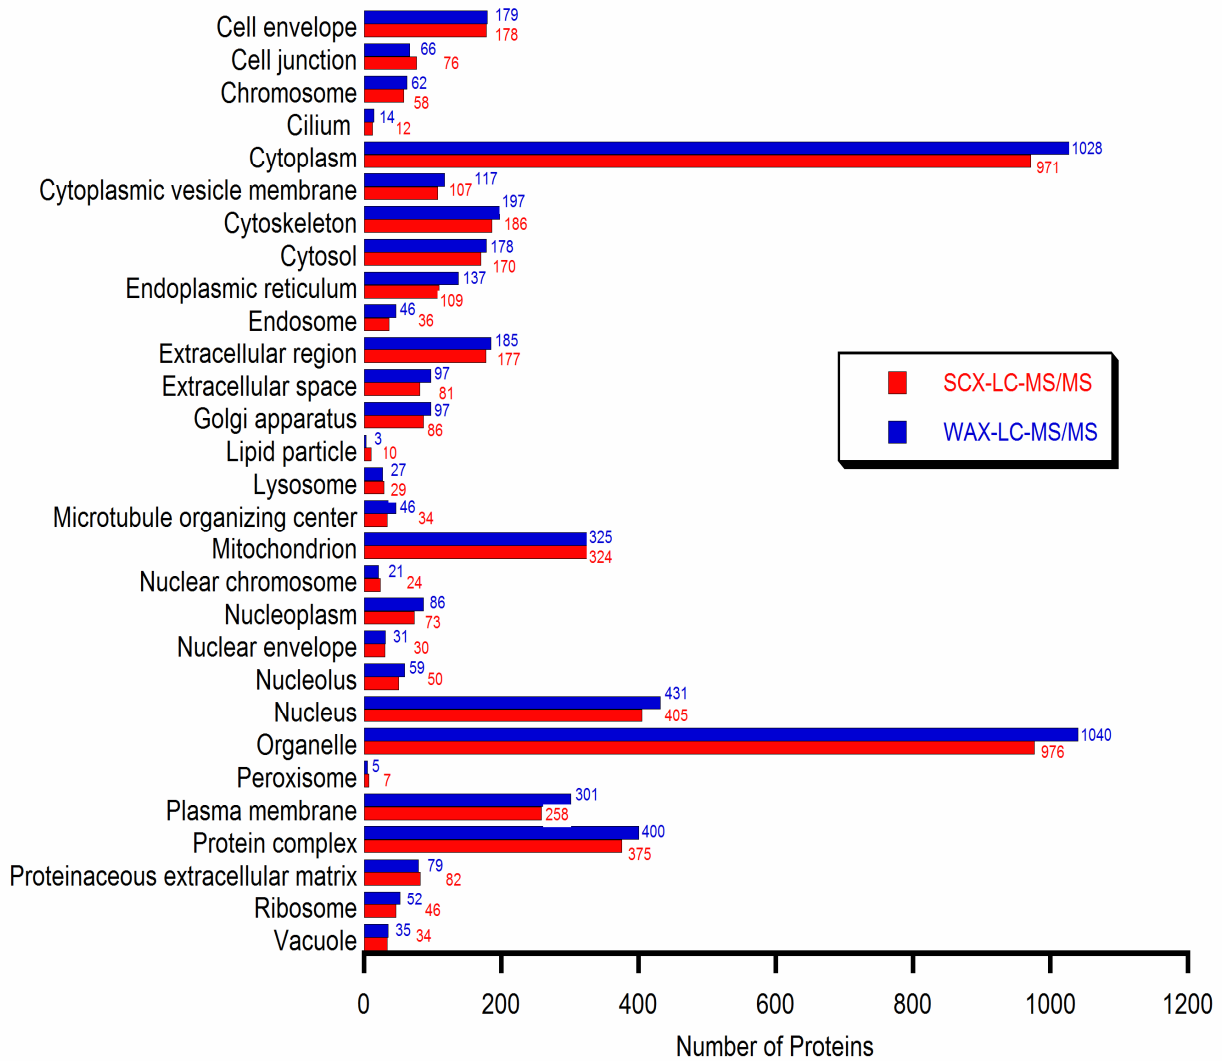

**Figure S2.** GO cellular components profile of protein IDs generated using SCX or WAX separation. All categories are counted non-exclusively, when a protein has more than one category for cellular components or molecular function.

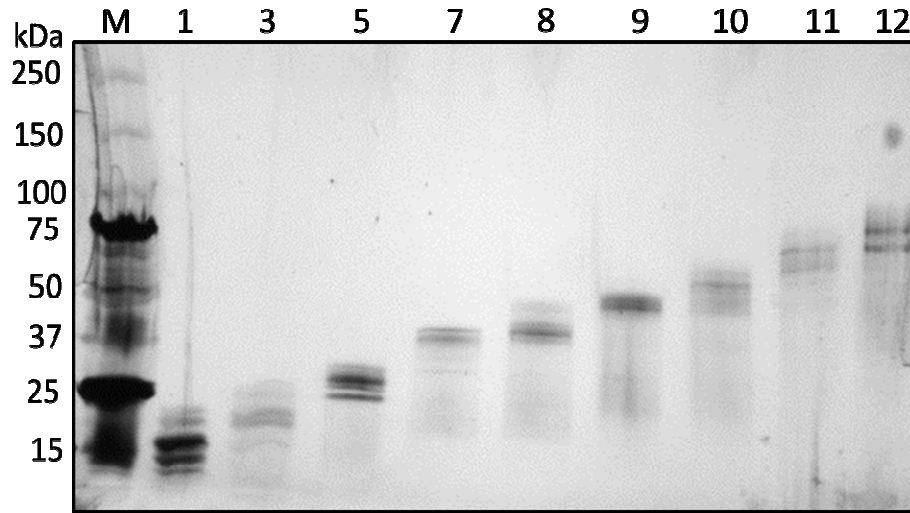

**Figure S3.** Silver stained gel of sensory epithelium GELFrEE fractions, to visualize protein separation in each fraction prior to MS analysis. (M) Protein marker, (1) Fraction 1, (3) Fraction 2, (5) Fraction 5, (7) Fraction 7, (8) Fraction 8, (9) Fraction 9, (10) Fraction 10, (11) Fraction 11, (12) Fraction 12.

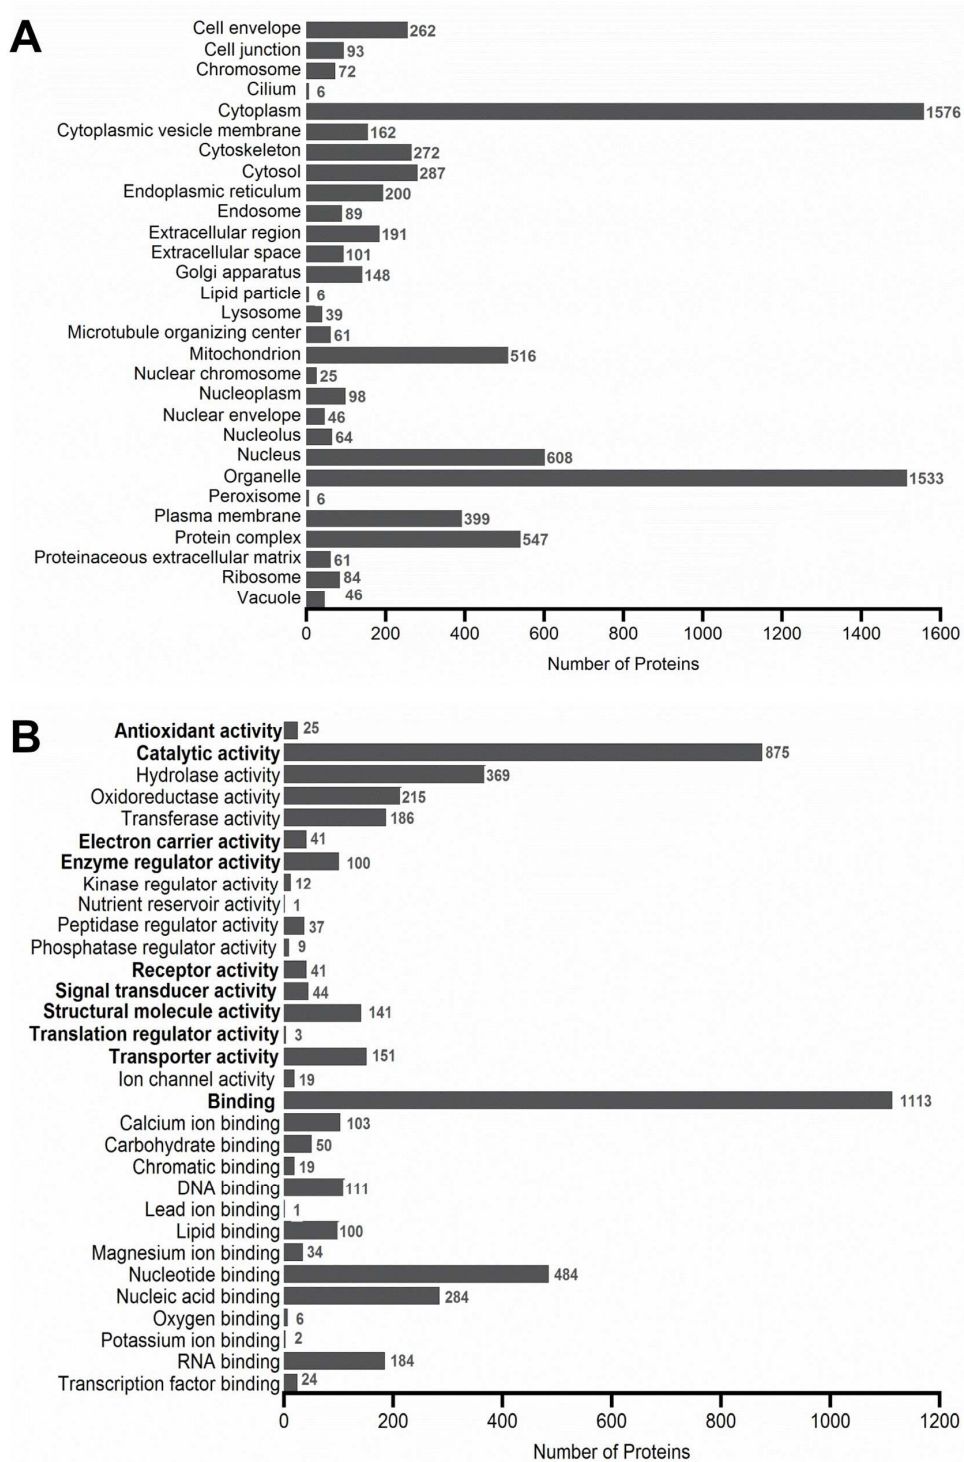

**Figure S4.** GO profile of sensory epithelium proteome for (A) cellular components and (B) molecular function. All categories are counted non-exclusively, when a protein has more than one category for cellular components or molecular function.
